# Supplementary material
Source: Springer Nature journal article supplement (https://www.springermedizin.de/resource/supplementary/12882_2014_782_MOESM6_ESM.pdf/9454702)

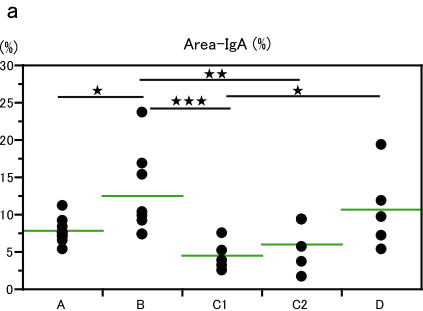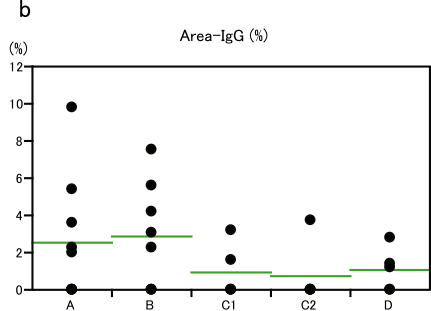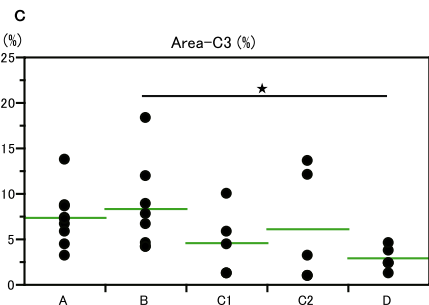

Supplement: MOESM6 [file 9454702]
